# Supplementary material
Source: ML conference proceedings conference paper supplement (https://openaccess.thecvf.com/content/WACV2021/html/Deng_Scale_Aware_Adaptation_WACV_2021_paper.html)

Table 1: Comparing our approach which incorporates scale adaptation to resampling the target imagery with and without standard domain adaptation. Underline indicates the test set is resampled to match the training set. mIoU: higher is better.

| Method                            | Training set | GSD | Test set | GSD        | mIoU         |
|-----------------------------------|--------------|-----|----------|------------|--------------|
| No domain adaptation              | Vaihingen    | 9cm | Potsdam  | 5cm        | 32.12        |
| <u>No domain adaptation</u>       |              | 9cm |          | <u>9cm</u> | 29.01        |
| Standard domain adaptation        |              | 9cm |          | 5cm        | 41.33        |
| <u>Standard domain adaptation</u> |              | 9cm |          | <u>9cm</u> | 40.38        |
| Our approach                      |              | 9cm |          | 5cm        | <b>46.54</b> |

Table 2: Comparing our approach which incorporates scale adaptation to multi-scale data augmentation with and without standard domain adaptation. These results are for Vaihingen  $\rightarrow$  Potsdam. w/o DA means no domain adaptation. AdaptSegNet corresponds to standard domain adaptation. Target-only is the oracle where the model is trained using the target dataset and represents the upper limit on performance. mIoU: higher is better.

|             | Method      | Data Aug. | Imp. Sur.    | Build.       | Low veg.     | Tree         | Car          | mIoU         | IoU gap      |
|-------------|-------------|-----------|--------------|--------------|--------------|--------------|--------------|--------------|--------------|
| w/o DA      | Baseline    | ×         | 22.85        | <b>52.57</b> | 21.56        | 46.72        | 19.39        | 32.62        | 38.41        |
|             | Baseline    | ✓         | <b>30.87</b> | 50.23        | <b>23.09</b> | <b>47.34</b> | <b>20.66</b> | <b>34.44</b> | <b>36.59</b> |
| w/ DA       | AdaptSegNet | ×         | 54.72        | 58.08        | 24.74        | 43.68        | 35.31        | 43.14        | 27.88        |
|             | AdaptSegNet | ✓         | 54.04        | 58.07        | 26.07        | 46.71        | 34.51        | 43.88        | 26.93        |
|             | Ours        | ×         | <b>55.22</b> | <b>61.46</b> | <b>31.34</b> | <b>50.40</b> | <b>39.86</b> | <b>47.66</b> | <b>23.37</b> |
| target-only | Baseline    | ×         | 79.25        | 85.84        | 73.21        | 68.36        | 78.93        | 71.03        | 0.00         |

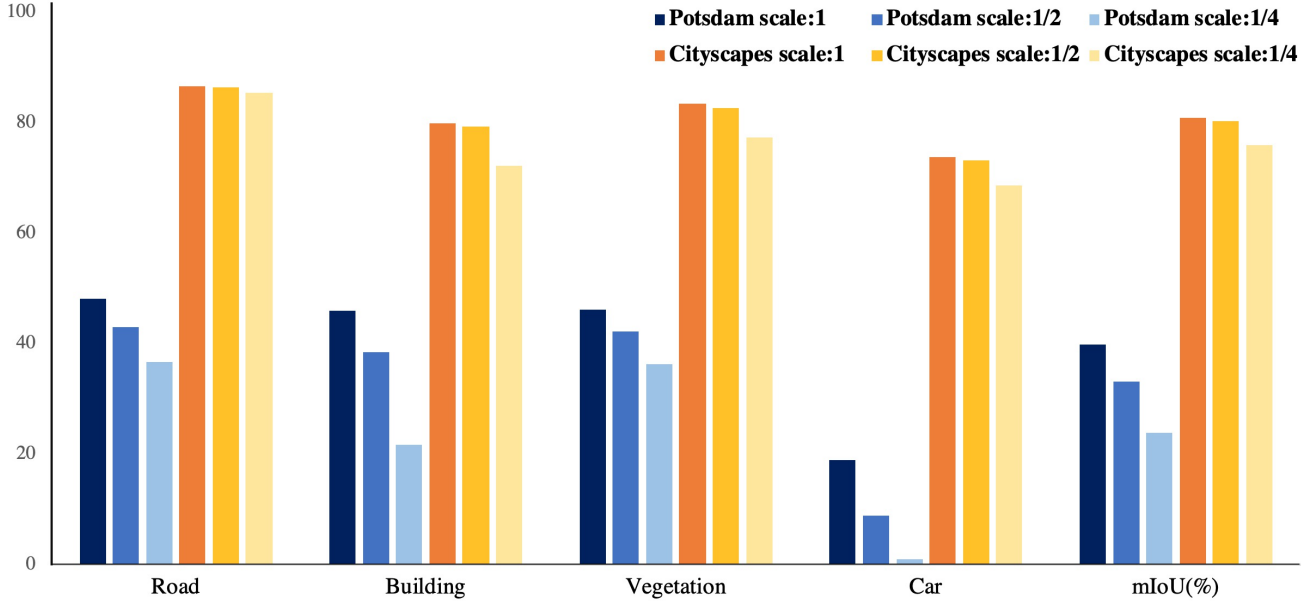

Figure 1: Scale is more important for adapting between overhead than ground-level image datasets. Performance decreases from changing the scales of target overhead (blue bars) and driving scene (yellow bars) datasets

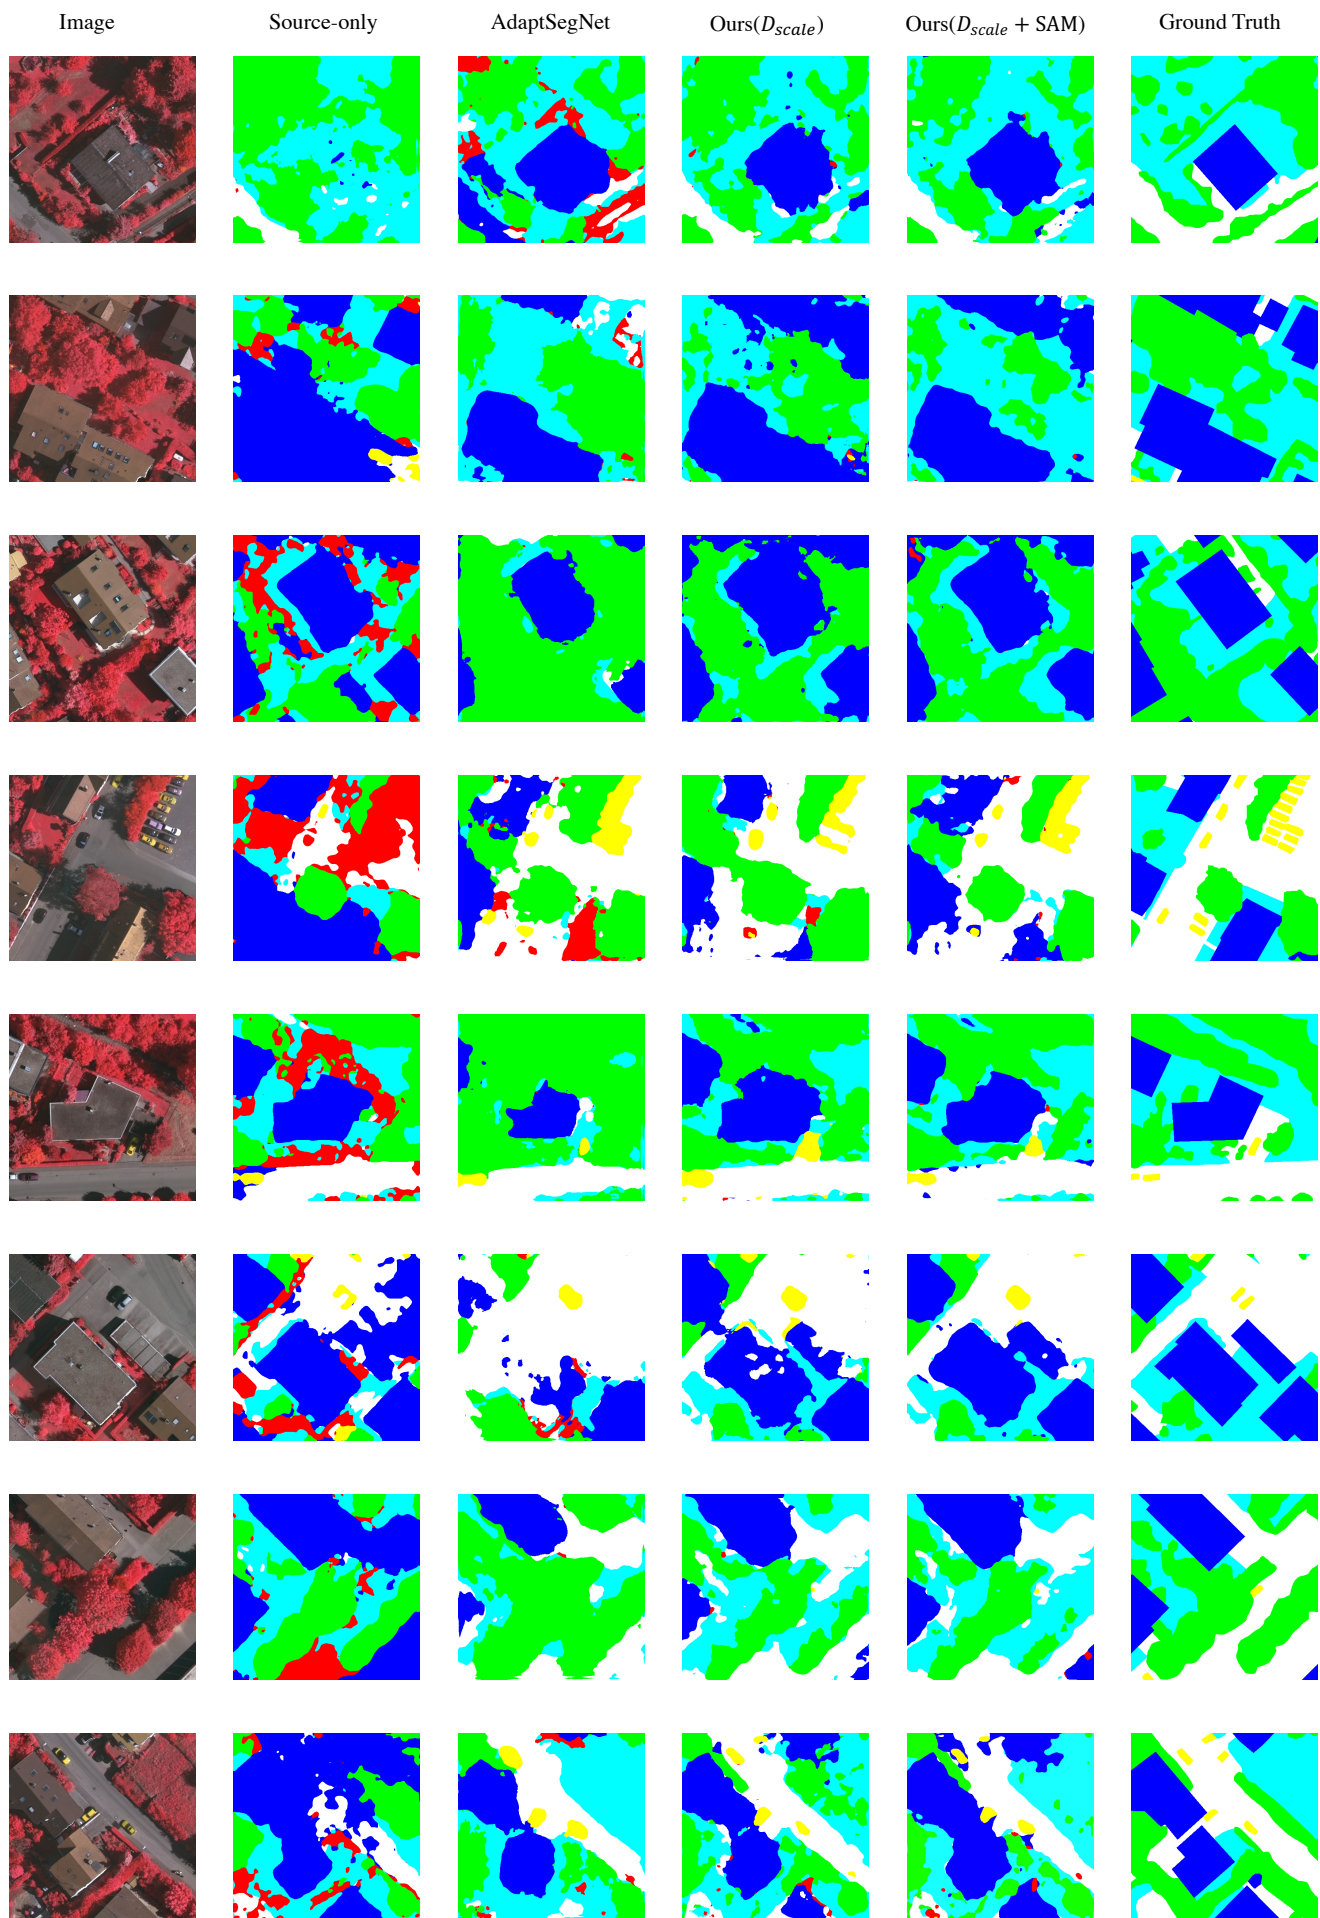

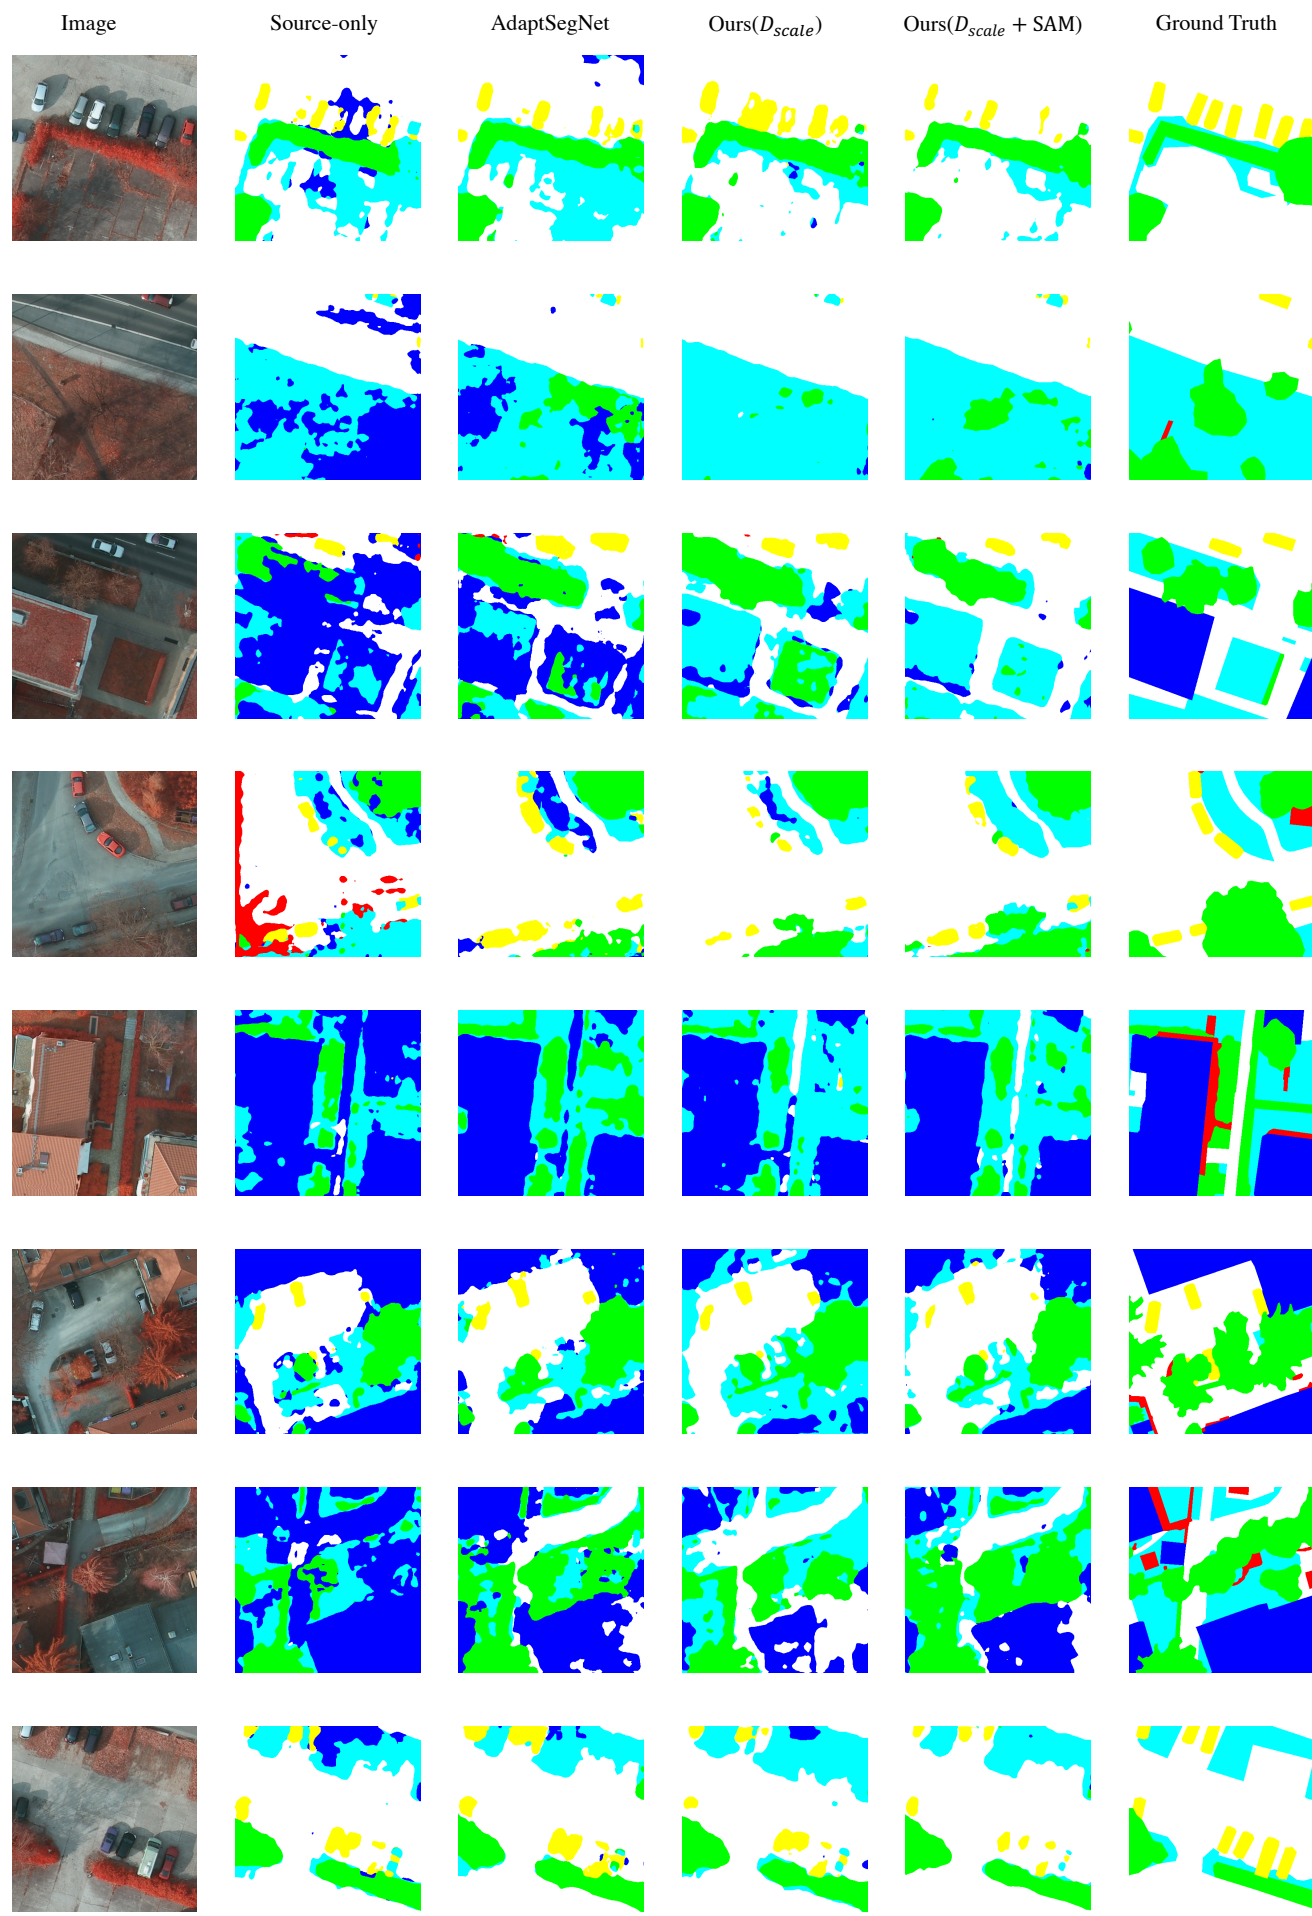

Supplement: Supplementary file 1 [file Deng_Scale_Aware_Adaptation_WACV_2021_supplemental.pdf]
